# Supplementary material
Source: HighWire-hosted journal article supplement (https://fn.bmj.com/content/archdischild-2020-321449)
Supplement: inline-supplementary-material-1 [file inline-supplementary-material-1.pdf]

**e table 1: Study outcomes****e Table 2:** Sensitivity analysis after including multiple results from the same study**e Table 3:** GRADE of evidence**e Figure 1:** Figure 1: Flow chart for study selection (IVH- Intraventricular hemorrhage, ROP- Retinopathy of prematurity, LOS- Late onset sepsis, CLD- Chronic lung disease, NEC- Necrotizing enterocolitis, PVL- Periventricular leukomalacia)**e Figure 2:** Forest plot showing the association between hyperglycemia and any grade intraventricular

hemorrhage. (SE- Standard error, CI- Confidence interval, IV- Inverse variance)

**e Figure 3:** Forest plot showing the association between hyperglycemia and severe intraventricular hemorrhage

(SE- Standard error, CI- Confidence interval, IV- Inverse variance)

**e Figure 4:** Forest plot showing the association between hyperglycemia and any stage retinopathy of prematurity. (SE- Standard error, CI- Confidence interval, IV- Inverse variance)**e Figure 5:** Forest plot showing the association between hyperglycemia and severe retinopathy of prematurity. (SE- Standard error, CI- Confidence interval, IV- Inverse variance)**e Figure 6:** Forest plot showing the association between hyperglycemia and late onset sepsis. (SE- Standard error, CI- Confidence interval, IV- Inverse variance)**e Figure 7:** Forest plot showing the association between hyperglycemia and undefined necrotizing enterocolitis. (SE- Standard error, CI- Confidence interval, IV- Inverse variance)**e Figure 8:** Forest plot showing the association between hyperglycemia and severe necrotizing enterocolitis. (SE- Standard error, CI- Confidence interval, IV- Inverse variance)**e Figure 9:** Forest plot showing the association between hyperglycemia and chronic lung disease. (SE- Standard error, CI- Confidence interval, IV- Inverse variance)**e Figure 10:** Forest plot showing the association between hyperglycemia and periventricular leukomalacia. (SE-Standard error, CI- Confidence interval, IV- Inverse variance)**e Figure 11:** Forest plot showing the association between hyperglycemia and disability. (SE- Standard error, CI- Confidence interval, IV- Inverse variance)**e Figure 12:** Bubble plot showing predicted relationship between blood glucose level and unadjusted mortality.**e Figure 13:** Bubble plot showing predicted relationship between blood glucose level and unadjusted any grade intraventricular hemorrhage (IVH)**e Figure 14:** Funnel plot of studies reporting unadjusted any grade intraventricular haemorrhage (IVH)**e Table 1: Study Outcomes**

| Study ID        | Results                                                                                                                                                                                                                                                                                                                                                                                                                                                   | Covariates adjusted for | Author's conclusion                                                                                                 |
|-----------------|-----------------------------------------------------------------------------------------------------------------------------------------------------------------------------------------------------------------------------------------------------------------------------------------------------------------------------------------------------------------------------------------------------------------------------------------------------------|-------------------------|---------------------------------------------------------------------------------------------------------------------|
| Villamizar 2020 | HG for $\geq 5$ days was negatively associated with fat mass and fat free mass z scores at discharge, and fat free mass z score at 4 months' PMA. Hyperglycaemia for $\geq 5$ days was negatively associated with cognition, language, and motor scores on the BSDI-III at 12months. Associations with body composition and BSDI-III were diminished when models included first week nutrition yet remained unchanged when illness severity was included. | Gender, GA, CRIB score  | HG is associated with decreased lean mass at 4 months' PMA and poorer neurodevelopmental outcome at 12 months' PMA. |
| Vannadil 2019   | Group with higher maximum glucose (Mean $10.15 \pm 0.89$ mmol/L vs mean $8.71 \pm 0.59$                                                                                                                                                                                                                                                                                                                                                                   |                         | A high average blood glucose level in neonates during the                                                           |

|                    |                                                                                                                                                                                                                                                                                                                                                                                                                                                                                                                                      |                 |                                                                                                                                                                                     |
|--------------------|--------------------------------------------------------------------------------------------------------------------------------------------------------------------------------------------------------------------------------------------------------------------------------------------------------------------------------------------------------------------------------------------------------------------------------------------------------------------------------------------------------------------------------------|-----------------|-------------------------------------------------------------------------------------------------------------------------------------------------------------------------------------|
|                    | mmol/L) had a higher incidence of ROP. $p=0.179$ .                                                                                                                                                                                                                                                                                                                                                                                                                                                                                   |                 | first week of life is an indicator for developing ROP at a later date                                                                                                               |
| Bochkova 2019      | 9 babies from the insulin group and 7 from the no insulin group developed grade II and III IVH.                                                                                                                                                                                                                                                                                                                                                                                                                                      |                 | In preterm infants with VLBW, HG can be considered a transitional state. The appointment of insulin inappropriate                                                                   |
| Jagla 2019         | Univariate analysis revealed that HG was not associated with mortality before term-equivalent age ( $p=0.664$ ). Higher GV was associated with grade 3 or 4 IVH (CV $p=0.025$ ; MAGE $p=0.032$ ) and ROP requiring treatment (SD $p=0.019$ ; CV $p=0.026$ ; MAGE=0.029). However, logistic regression models did not show a significant association between GV and grade 3 or 4 IVH (MAGE OR 1.31; 95% CI 0.16-10.67) or ROP requiring treatment (MAGE OR 1.74; 95% CI 0.57-5.32).                                                   | GA, O2 exposure | Logistic regression model did not show any association between glucose variability and severe IVH or ROP. No association was found between HG and IVH or PVL or mortality.          |
| Zamir 2019         | HG and its duration during postnatal weeks 1–4 were associated primarily with higher diastolic BP z-scores at 6.5 years of age. Duration of hyperglycaemia >14 mmol/L was significantly positively associated with both SBP and DBP z-scores. Each additional day with hyperglycaemia >14mmol/L was associated with an increase of ~0.05 SD in both SBP and DBP ( $P=0.047$ and 0.014, respectively).                                                                                                                                |                 | HG and its duration during postnatal weeks 1–4 were associated primarily with higher diastolic BP z-scores.                                                                         |
| Goldner Perez 2019 | No deaths either in HG or NG group. Incidence of NEC and PDA was more in HG group compared to NG group and is statistically significant ( $p=0.039$ and 0.001 respectively), whereas the incidence of CLD and IVH was not statistically significant. Moderate HG in the first week ( $p=0.002$ ) and month ( $p=0.026$ ) of life was associated with motor deficits. Composite BSID score was significantly lower (1SD) in infants with HG greater than 10mmol/L in the first week of life ( $p=0.02$ ), but not in the first month. |                 | HG had minimal effect on neurodevelopment. Moderate HG in the 1 <sup>st</sup> week of life is associated with motor and language deficits, including after adjusting for GA and BW. |
| Turai 2019         | No significant difference in terms of mortality ( $p=0.093$ ). The GA and BW of the hyperglycaemic infants were significantly lower ( $p<0.001$ ). The incidence of severe ROP and CLD was significantly higher in HG group ( $p=0.012$ and 0.002). Among survivors ( $n=155$ ), HG was a risk factor for severe retinopathy ( $p<0.001$ ) in logistic regression analysis. Out of 17 patients with high creatinine 10 had HG.                                                                                                       | GA, BW          | HG is common in preterm infants. Monitoring of these infants for ROP, kidney dysfunction, and hypertension is recommended.                                                          |
| Zamir 2018         | Higher 28-day mortality by a multiplicative factor of 2.45, adjusted for GA and BW (Beta 0.897; $P=.006$ ). HG for 2 consecutive days-multiplicative factor of 2.55, adjusted GA and BW (B 0.935; $P=.005$ ). No differences were noted with regards to sex, NEC, IVH grades 3-4 or number of confirmed sepsis events between HG and NG group.                                                                                                                                                                                       | GA, BW          | HG during the first 28 days is associated with increased mortality. Insulin treatment during this period was associated with lower mortality.                                       |
| Slidsborg          | After adjustment for known risk factors,                                                                                                                                                                                                                                                                                                                                                                                                                                                                                             | GA, SGA,        | An independent association                                                                                                                                                          |

|              |                                                                                                                                                                                                                                                                                                                                                                                                                                                                                                                                                                                                                                                                                     |                                                                                        |                                                                                                                                                                                                         |
|--------------|-------------------------------------------------------------------------------------------------------------------------------------------------------------------------------------------------------------------------------------------------------------------------------------------------------------------------------------------------------------------------------------------------------------------------------------------------------------------------------------------------------------------------------------------------------------------------------------------------------------------------------------------------------------------------------------|----------------------------------------------------------------------------------------|---------------------------------------------------------------------------------------------------------------------------------------------------------------------------------------------------------|
| 2018         | hyperglycaemic index remained a statistically independent risk factor for development of treatment demanding ROP (OR: 1.022; 95%CI 1.002 to 1.042; p 0.031)                                                                                                                                                                                                                                                                                                                                                                                                                                                                                                                         | Gender                                                                                 | was found between HG events and treatment demanding ROP, when adjusted for known risk factors.                                                                                                          |
| Naseh 2017   | Days with glucose >8.3 mmol/l correlated independently with reduced white matter volume (p = 0.045). When BW was included in the analysis, days with glucose >8.3 mmol/l reached borderline significance (p = 0.068). In the 45 infants with follow up, only days with glucose >8.3 mmol/l was independently associated with a lower motor index on BSID-III.                                                                                                                                                                                                                                                                                                                       |                                                                                        | Prolonged duration of high blood glucose >8.3 mmol/l during the first week of life is associated with reduced white matter volume and may also be associated with poorer motor performance at 2.5 years |
| Tottman 2017 | Death in NG group 6/287 (2%) vs HG group 6/73 (8%) before discharge. Infants in the NG category had shorter neonatal stays and were less likely to have severe ROP, NEC, LOS, or CLD. HG and unstable infants were less likely to survive without neonatal morbidity and less likely to survive without neurodevelopmental impairment at 2 years of age. Higher mean blood glucose concentration was seen in the HG and unstable groups, and was associated with worse neonatal and 2-year outcomes. No associations between measures of neonatal glycemia and neonatal or 2-year outcomes remained after correction for gestation, birth weight z-score, and socioeconomic status. | GA, BW, ethnicity, CRIB II score Socioeconomic quantile, type of assessment at 2 years | In very preterm infants, measures of neonatal glycemia are markers of GA and intrauterine growth, and are not independent predictors of neonatal illness or outcomes at 2 years of age                  |
| Akmal 2017   | Mortality- HG- 18 out of 40 neonates, NG-3 out of 20 neonates, p= 0.022. Mild/moderate HG vs Severe HG 7 /20 neonates vs 11 /20 neonates, P=0.2. There was statistically significant relation between HG and LOS and IVH. (p = 0.001, 0.003 respectively). There was statistically significant relation between severity of HG and infection in 1st week and IVH (p = 0.025 & 0.05 respectively). A significant negative correlation was found with GA and BW (p = 0.019, 0.002 respectively).                                                                                                                                                                                      |                                                                                        | There was a statistically significant relation between HG and complications (LOS, IVH, death).                                                                                                          |
| Kim 2017     | In glycaemic characteristics, HG duration, average and maximum glucose level for 3 weeks after birth showed statistical significance in relation to ROP. But, in a multivariate analysis glycaemic characteristic were not. In comparisons based on ROP severity, HG duration, average blood glucose level of 3rd week after birth, and insulin use showed significant difference, but they were not independent factors.                                                                                                                                                                                                                                                           |                                                                                        | Glycaemic characteristics were statistically significantly associated with ROP, but they were not independent factors associated with ROP development.                                                  |
| Reyes 2017   | HG was significantly associated with ROP with a p value of 0.031.                                                                                                                                                                                                                                                                                                                                                                                                                                                                                                                                                                                                                   |                                                                                        | HG is an important risk factor for ROP.                                                                                                                                                                 |
| Bermick 2016 | IVH developed more frequently in infants with HG (P = 0.006, odds ratio (OR) 2.3, 95% confidence interval (CI) 1.3 to 4.1), in infants with hypernatremia (P = 0.018, OR 2.0, 95% CI 1.2 to 3.5) and in infants with hypernatremia plus HG (P = 0.001, OR 3.2, 95% CI 1.6 to 6.4). Multivariate regression analysis confirmed the independent association of                                                                                                                                                                                                                                                                                                                        |                                                                                        | HG increases the risk of IVH in hypernatremic preterm infants                                                                                                                                           |

|                 |                                                                                                                                                                                                                                                                                                                                                                                                                                                                                                                                                                                                               |                                                                                                                                                              |                                                                                                                                                                                                                   |
|-----------------|---------------------------------------------------------------------------------------------------------------------------------------------------------------------------------------------------------------------------------------------------------------------------------------------------------------------------------------------------------------------------------------------------------------------------------------------------------------------------------------------------------------------------------------------------------------------------------------------------------------|--------------------------------------------------------------------------------------------------------------------------------------------------------------|-------------------------------------------------------------------------------------------------------------------------------------------------------------------------------------------------------------------|
|                 | higher risk of IVH with the presence of hypernatremia plus HG ( $P = 0.015$ , OR 2.6, 95% CI 1.2 to 5.5) but not with hypernatremia or HG alone.                                                                                                                                                                                                                                                                                                                                                                                                                                                              |                                                                                                                                                              |                                                                                                                                                                                                                   |
| Lee 2016        | HG alone was not associated with severe ROP (OR=0.88 (95% CI 0.66-1.17)).                                                                                                                                                                                                                                                                                                                                                                                                                                                                                                                                     | GA, SGA status, year of discharge, sex, APGAR score at 5 minutes, need for mechanical ventilation, O2 supplementation, steroid use, insulin use, bacteraemia | HG alone was not associated with severe ROP in ELBW infants.                                                                                                                                                      |
| Manzoni 2016    | After controlling for all variables significantly associated with infections (i.e., LF exposure, birth weight, gestational age), occurrence of at least one episode of early HG spell retained a significant and independent association with the occurrence of infections only by Gram-positives (OR: 5.45; 95% CI: 1.92–15.42; $p < 0.001$ ) and fungal agents (OR: 3.37; 95% CI: 1.01–11.97; $p = 0.04$ ), but not by gram negatives. The day of onset of infections occurred significantly earlier in HG infants compared with NG: 13.9 versus 20.1 mean days ( $p = 0.03$ ), regardless of the pathogen. | Lactoferrin exposure, BW, GA                                                                                                                                 | Early HG spells are significantly predictive of development of LOS by gram-positives and fungal microorganisms in preterm infants                                                                                 |
| Scheurer 2016   | Inpatient days, IVH and ROP was significantly higher in HG group compared to NG group. ( $p = <0.0001$ , 0.004 and 0.0001 respectively). Infants with >5 days of HG were lighter (5345 vs 6455 g, $P \leq 0.001$ ), shorter (57.9 vs 60.9 cm, $P \leq 0.01$ ), had smaller occipital-frontal head circumference (39.4 vs 42.0 cm, $P \leq 0.05$ ) and were leaner (percent body fat 15.0 vs 23.8, $P \leq 0.01$ ) at 4 months CA                                                                                                                                                                              |                                                                                                                                                              | HG is associated with decreased body size and lower adiposity at 4 months CA independent of nutritional deficit, insulin use and illness. These changes may influence long-term growth and cognitive development. |
| De Carolis 2015 | Mortality in NG group 18/79 (22.7) vs HG group 18/53 (33.9). Any IVH rate was higher in HG group and Hypo & HG group respect to NG Group ( $p=0.002$ ) as well as IVH grade3. The rate of both any ROP and ROP $\geq$ stage 2 in survived neonates was higher in HG group respect to N-Group ( $p=0.008$ and $p=0.002$ , respectively)                                                                                                                                                                                                                                                                        |                                                                                                                                                              | All forms of IVH, ROP and sepsis was higher in the HG group.                                                                                                                                                      |
| Nicolaeva 2015  | There were no significant differences in the blood glucose levels between children with and without ROP, and also between children with spontaneously regressing ROP and progressive ROP ( $p>0.05$ ).                                                                                                                                                                                                                                                                                                                                                                                                        |                                                                                                                                                              | The blood glucose level is not related to the development of ROP nor with its progression or regression.                                                                                                          |
| Stensvold 2015  | After the introduction of early enhanced TPN, the prevalence of mortality was higher (10.9% [14 of 129] vs 24.3% [52 of 214], $P = .003$ ). Multivariate analysis- Severe HG is an independent risk factor for death (OR, 4.68; 95%CI, 1.82-12.03).                                                                                                                                                                                                                                                                                                                                                           | Early enhanced parenteral nutrition, GA, CRIB score, any vasopressor use                                                                                     | In the multivariable analysis early, severe HG is a strong predictor of death                                                                                                                                     |

|                      |                                                                                                                                                                                                                                                                                                                                                                                                                                                                                                                                                                                                 |                                                                                                                                                     |                                                                                                                                                                                           |
|----------------------|-------------------------------------------------------------------------------------------------------------------------------------------------------------------------------------------------------------------------------------------------------------------------------------------------------------------------------------------------------------------------------------------------------------------------------------------------------------------------------------------------------------------------------------------------------------------------------------------------|-----------------------------------------------------------------------------------------------------------------------------------------------------|-------------------------------------------------------------------------------------------------------------------------------------------------------------------------------------------|
| Szymońska 2015       | The tendency to increased mortality by the 28th day of life ( $p=0.09$ for $X^2$ test) was observed. Moreover, a significant positive association with the severity of HG ( $p=0.02$ for Cochran–Armitage test) was revealed. A higher incidence of IVH ( $p=0.09$ ) in groups with mild and moderate/severe HG was noted. Other outcomes like CLD, PVL, NEC, ROP and hospital stay did not significantly differ between the groups.                                                                                                                                                            |                                                                                                                                                     | A significantly higher mortality rate on the 28th day of life noted.                                                                                                                      |
| Cardona 2014         | Rate of ROP increased with hyperglycaemia at 1 week and 1 month ( $p=0.003$ and $p=0.05$ , respectively). As the hours of HG increased, so did the probability of increase in the stage of ROP ( $p=0.003$ ). There was a trend for increase in ROP with HG $>10\text{mmol/L}$ when corrected for BW and GA ( $p=0.1$ )                                                                                                                                                                                                                                                                         |                                                                                                                                                     | A significantly higher incidence of ROP were seen with HG in the 1st week and month of life.                                                                                              |
| Ahmadpour-Kacho 2014 | The severity of ROP showed no significant differences between the 2 groups ( $P=0.35$ ). The logistic regression for GA and BW showed a significant correlation between HG and ROP ( $P=0.0001$ ).                                                                                                                                                                                                                                                                                                                                                                                              | GA, BW                                                                                                                                              | HG is an important risk factor for ROP that can be prevented along with other risk factors by accurate supervision                                                                        |
| Mohsen 2014          | Mortality- NG vs HG 0 vs 4 (13%), $p=0.031$ . There were more cases of ROP in the HG group compared with the NG group (45% vs 15%, $P=0.007$ ). Patients who developed ROP had significantly higher maximum and average glucose concentrations when compared with non-ROP patients. In a logistic regression model including all significant variables, average blood glucose in the first week of life was the factor independently associated with ROP with an OR of: 1.77 (95% confidence interval: 1.08 to 2.86), $p=0.024$ . CLD and IVH was not significantly different between 2 groups. |                                                                                                                                                     | Elevated average blood glucose concentrations in the first week of life is independently associated with the development of ROP                                                           |
| Sabzehei 2014        | 91 out of 179 in HG group and 73 out of 385 in the NG group expired. (OR-4.2, 95% CI- 3-6.5, $p<0.001$ ). Higher incidence of IVH>Gr2 (OR-2.88, 95%CI-1.28-6.49, $p=0.01$ ), hospital stay>28 days in survivors (OR-3.56, 95%CI- 2.02-6.25, $p<0.001$ ) and more $\geq$ stage 2 ROP (OR-2.05, 95%CI-1.11-3.78, $p=0.02$ )                                                                                                                                                                                                                                                                       |                                                                                                                                                     | HG is associated with IVH, ROP in survived neonates, prolonged hospitalization and risk of mortality. These findings underscore the need for prompt diagnosis and appropriate management. |
| Auerbach 2013        | Increase in HG duration was most prominently increasing the adjusted OR for severe IVH (OR = 10.33, 95% CI = 10.0-10.6, $P=.033$ ). 35 out of 154 neonates with HG compared to 2 out of 24 neonates with NG died.                                                                                                                                                                                                                                                                                                                                                                               | Semi-quantitative severity index score based on death, days of ventilation, BPD, need for dopamine treatment, and day of enteral feeds commencement | Longer duration of HG in the first 96 hours of life was most strongly associated with severe IVH in preterm infants                                                                       |
| Mohamed 2013         | HG days (mean) $2.3 \pm 3.2$ (No ROP group) vs $7.1 \pm 6.6$ (ROP group) $p<0.0001$ . Multiple                                                                                                                                                                                                                                                                                                                                                                                                                                                                                                  | GA, sepsis, IVH, PDA,                                                                                                                               | HG is associated with the development of ROP in                                                                                                                                           |



|                    |                                                                                                                                                                                                                                                                                                                                                                                                                                                                                                                                                                                                                                                                                                                                                                                             |                                                                                          |                                                                                                                                                                                                                                     |
|--------------------|---------------------------------------------------------------------------------------------------------------------------------------------------------------------------------------------------------------------------------------------------------------------------------------------------------------------------------------------------------------------------------------------------------------------------------------------------------------------------------------------------------------------------------------------------------------------------------------------------------------------------------------------------------------------------------------------------------------------------------------------------------------------------------------------|------------------------------------------------------------------------------------------|-------------------------------------------------------------------------------------------------------------------------------------------------------------------------------------------------------------------------------------|
|                    | regression analysis for any ROP = HG days – Beta coefficient= 0.07, OR (95%CI) = 1.073 (1.004, 1.146), p value=0.04. Multiple regression analysis for stage 3 ROP= HG days- Beta coefficient= 0.0003, OR (95% CI) = 1.000 (0.938, 1.066), p = 0.99                                                                                                                                                                                                                                                                                                                                                                                                                                                                                                                                          | ventilation days, neonatal steroids                                                      | premature infants                                                                                                                                                                                                                   |
| Ramel 2013         | Controlling for BW, HG was a statistically significant predictor of ROP >stage 2, z=2.39, P=0.02. HG was also a significant predictor of number of episodes of sepsis, z=5.90, P=0.001. HG was not a significant predictor of IVH, z=0.64, P=0.53. By 24 months, infants with 5+ days of HG were predicted to be 2 kg lighter and 5cm shorter than infants with 0 days of HG. Statistically significant for prediction of Bayley scale scores at 12 months (initial status), but not significant for prediction of Bayley scale score at 24 months. (All infants were followed to 1-year CA and 62 (78%) were followed to 2 years CA)                                                                                                                                                       |                                                                                          | Neonatal HG was associated with poor physical growth until at least 2 years CA in this cohort of VLBW preterm infants.                                                                                                              |
| van der Merwe 2013 | Though HG is a significant risk factor for development of ROP in univariate analysis(p=0.0267), in multiple regression analysis it was not found to be significantly associated with ROP                                                                                                                                                                                                                                                                                                                                                                                                                                                                                                                                                                                                    |                                                                                          | HG is not a risk factor for ROP                                                                                                                                                                                                     |
| Yoo 2013           | Discharge mortality: N=4/38(10.5%), P= 11/101 (10.9%), T= 38/121 (31.4%)<br>Adjusted odds ratio- P to N odds ratio (95% CI) = 0.9 (0.2-4.8), p value- 0.89, T to N odds ratio (95% CI) = 0.8 (0.1-5.2), p= 0.84. In multivariate analysis adjusted for GA, BW, RDS, and ventilator support/major surgery/antibiotic use in 14 days, there was no significant differences in CLD, severe IVH, PVL, NEC and ROP requiring treatment between groups.<br>Growth rate was highest in group P and lowest in group T. Although the birth weight of P was significantly smaller than N, P infants gained weight faster than N infants. Long term development found no significant difference between group N and P in terms of cerebral palsy, hearing loss or developmental delay in Bayley scale. | GA, BW, RDS, Ventilator support/ major surgery/ any antibiotics use in the first 14 days | Permissive HG up to < 16.66 mmol/L without insulin treatment during the first 14 days of life is not associated with osmotic diuresis or increased mortality or morbidities, suggesting that it is not detrimental in ELBW infants. |
| Bozdag 2012        | Multivariate analysis for ROP- duration of HG (days; OR 3.26; 95% CI 1.09–9.80; p= 0.035) was significantly associated with ROP.                                                                                                                                                                                                                                                                                                                                                                                                                                                                                                                                                                                                                                                            | BW, Gram positive sepsis, IVH (grade 3 or more), RDS and days on CPAP, Oxygen            | Duration of HG may contribute to the development of ROP                                                                                                                                                                             |
| Kaempf 2011        | Higher cumulative mean glucose, more episodes of HG, and more insulin exposure were associated with an increased incidence and severity of ROP. Ordinal logistic regression identified higher glucose as predictors for severity of ROP.                                                                                                                                                                                                                                                                                                                                                                                                                                                                                                                                                    |                                                                                          | After adjusting for important risk factors, HG and especially Insulin use in premature infants may increase the risk of ROP.                                                                                                        |
| Chavez-Valdez      | The frequency of levels of blood sugar >8.3mmol/L was equal among neonates those                                                                                                                                                                                                                                                                                                                                                                                                                                                                                                                                                                                                                                                                                                            |                                                                                          | High overall glycaemic status is associated with the                                                                                                                                                                                |

|                   |                                                                                                                                                                                                                                                                                                                                                                                                                                                                                                                                                                                                                                                                                                                                                                      |                               |                                                                                                                                                                                                                  |
|-------------------|----------------------------------------------------------------------------------------------------------------------------------------------------------------------------------------------------------------------------------------------------------------------------------------------------------------------------------------------------------------------------------------------------------------------------------------------------------------------------------------------------------------------------------------------------------------------------------------------------------------------------------------------------------------------------------------------------------------------------------------------------------------------|-------------------------------|------------------------------------------------------------------------------------------------------------------------------------------------------------------------------------------------------------------|
| 2011              | who had ROP and those who did not. Multivariate regression confirmed 30 days' time weighted glucose level of $\geq 6.5$ mmol/L (OR 9.4 to 10) was significantly associated with development of ROP. ( $p < 0.05$ )                                                                                                                                                                                                                                                                                                                                                                                                                                                                                                                                                   |                               | development of severe ROP.                                                                                                                                                                                       |
| Van der Lugt 2010 | 27 out of 66 infants with HG died during admission versus 62/793 infants without HG. A multivariable regression analysis - A significant increase in mortality in the exposed cohort ( $p = 0.001$ ). Sepsis was more prominent in infants with HG and a BW of $> 1,000$ gram ( $p = 0.002$ ) and/or GA of 29-32 weeks ( $p = 0.009$ ) than in infants without HG. Growth at 2 years of age was similar, but neurological and behavioural development was more frequently abnormal among those with neonatal HG ( $p = 0.036$ and $0.021$ respectively).                                                                                                                                                                                                             |                               | Mortality was higher in VLBW infants with HG treated with insulin during the neonatal period. At 2 years of age survivors showed normal growth, but a higher incidence of neurological and behavioural problems. |
| Alexandrou 2010   | The proportion with HG was significantly greater among infants who subsequently died (10 [53%] of 19 infants), compared with survivors (20 [21%] of 94 infants; $P = 0.03$ ). Multiple regression- For mortality in the first 24 hours $-1.3 \pm 0.54$ ( $B \pm SE$ ), $6.0$ (Wald $\chi^2$ ), $P = 0.01$ , OR (95%CI) - $3.7$ ( $1.3-10.6$ ). Multivariate logistic regression analysis revealed that hyperglycaemia during the first 24 hours of life remained a risk factor for WM reduction $= 1.1 \pm 0.58$ ( $B \pm SE$ ), $4.1$ (Wald $\chi^2$ ) $p = 0.04$ , OR (95%CI) - $3.1$ ( $1.0-9.2$ ). No statistically significant association between HG and IVH was found after adjusting gender and CRIB scores, (OR: $1.7$ [95% CI: $0.58-5.01$ ]; $P = .33$ ). | GA, gender, CRIB score        | HG on the first day of life was associated with increased mortality rates and brain damage, as reflected by WM reduction at term age                                                                             |
| Heimann 2007      | 11 infants out of 82 in Gr I, 9 out of 125 in Gr II and 10 out of 45 in Gr III died. A significant increase in mortality ( $P = 0.0001$ ) with increasing median blood glucose level and repeated ( $\geq 4$ ) incidents of blood glucose levels $\geq 8.3$ mmol/ and in infants with low GA ( $< 27$ weeks). Neonates who developed IVH, sepsis or ROP did not have an increased number of elevated blood glucose levels                                                                                                                                                                                                                                                                                                                                            |                               | Premature infants with low gestational age ( $< 27$ weeks), elevated median blood glucose levels and/or repeatedly elevated blood glucose levels have a significantly increased mortality.                       |
| Blanco 2006; USA  | 3 out of 19 in euglycemic group and 43 out of 150 in hyperglycaemic group died. The adjusted OR (95%CI) for death before discharge was $1.2$ ( $0.3-4.2$ ). Threshold ROP did not reach statistical significance, although laser treatment was required in 15 of 66 patients with ROP in the hyperglycaemic group and in none of the three patients with ROP in the euglycemic group ( $P = 0.21$ ). Adjusted OR (95%CI) for ROP was $4.6$ ( $1.1-18.9$ ). Hyperglycaemia was not found to be associated incidence of CLD or IVH (Adjusted OR (95%) $-1.8$ ( $0.4-7.4$ ) and $2.3$ ( $0.4-11.3$ ). OR (95%CI) for length of hospital stay of $> 90$ days was $2.5$ ( $0.6-11$ ).                                                                                     | GA, BW, Postnatal steroid use | Hyperglycaemia was associated with increased incidence of ROP.                                                                                                                                                   |
| Ertl 2006         | ROP occurred more frequently in HG infants.                                                                                                                                                                                                                                                                                                                                                                                                                                                                                                                                                                                                                                                                                                                          | GA, BW,                       | The logistic regression model                                                                                                                                                                                    |

|              |                                                                                                                                                                                                                                                                                                                                                                                                                                                                                                                                                                                                                                                                                                                                                  |                         |                                                                                                                                                                                                                                                |
|--------------|--------------------------------------------------------------------------------------------------------------------------------------------------------------------------------------------------------------------------------------------------------------------------------------------------------------------------------------------------------------------------------------------------------------------------------------------------------------------------------------------------------------------------------------------------------------------------------------------------------------------------------------------------------------------------------------------------------------------------------------------------|-------------------------|------------------------------------------------------------------------------------------------------------------------------------------------------------------------------------------------------------------------------------------------|
|              | Logistic regression model for ROP: HG OR (CI) - 3.15(1.12-8.84), p value- <0.05.                                                                                                                                                                                                                                                                                                                                                                                                                                                                                                                                                                                                                                                                 | APGAR score, CRIB score | revealed that HG may influence ROP development in VLBW                                                                                                                                                                                         |
| Hays 2006    | Early adverse outcomes (death or the occurrence of grade 3 or 4 IVH before day 10 of life) were associated with the average highest daily blood glucose concentration. (OR1.012). The length of hospital stay was associated with the time ratio for blood glucose concentrations of $\geq 8.3$ mmol/L through interaction with birth weight and the average highest daily percentage of inspired oxygen.                                                                                                                                                                                                                                                                                                                                        |                         | High blood glucose concentrations increase the risk of early death and grade 3 or 4 IVH and the length of hospital stay among survivors without IVH, which suggests that prevention and treatment of HG may improve the outcomes ELBW infants. |
| Kao 2006     | Multivariate analysis (Mortality)- Severe HG ( $\geq 10$ mmol/L) but not mild to moderate HG (6.66-9.9mmol/L) was significantly associated with mortality when assessed after 7 days of life (OR (95%CI)- 30.4(3.37-274)). Multivariate analysis- HG ( $\geq 10$ mmol/L) was not significantly associated with late onset sepsis when assessed after 3 or 7 days of life. (OR -0.92 and 0.56 respectively). Persistent severe HG was associated with the development of Stage II/III NEC, after adjusting for age and male gender (OR: 9.49, 95% CI: 1.52 to 59.3). There was no correlation between mean glucose category and number of days of mechanical ventilation or length of stay in the hospital on univariate or multivariate analyses | GA                      | Severe HG in the first few days after birth is associated with increased odds of death and sepsis in ELBW infants.                                                                                                                             |
| Manzoni 2006 | HG occurred significantly more often in group A (21/45, 46.6%) than in group B neonates (11/46, 23.9%) (OR 1.95, 95% CI 1.235-4.432, p=0.008)                                                                                                                                                                                                                                                                                                                                                                                                                                                                                                                                                                                                    |                         | HG is significantly more frequent in neonates who subsequently develop fungal rather than bacterial late-onset sepsis, with a typical 3-d interval.                                                                                            |
| Sutija 2004  | Proportion of neonates in whom HG could not be controlled was higher in the ROP group (36.8% vs 0.5%; p<0.0001)                                                                                                                                                                                                                                                                                                                                                                                                                                                                                                                                                                                                                                  |                         | HG presents a major risk for ROP in VLBW neonates                                                                                                                                                                                              |
| Garg 2003    | The patients in the ROP group had higher glucose maximums (p = 0.017), averages (p = 0.043) and medians (p = 0.048) for the first month of life. On more days than controls, ROP patients had at least one glucose value exceeding 8.3mmol/L (ROP 8.4 days, controls 5.3 days, p = 0.028). A simple logistic regression analysis suggested an increased risk for the development of ROP for each 0.55mmol/L increase of mean serum glucose (OR 1.96; 95% CI 1.13 to 3.42). In a multiple regression model: An increased ROP risk for each 0.55mmol/L increase of mean serum glucose (OR 2.7; 95% CI 1.044 to 8.62)                                                                                                                               | BW, Vitamin E and FiO2  | The glucose levels in the first month of life are associated with development of ROP.                                                                                                                                                          |
| Chen 2001    | 10 of 39 HG infants died compared to 15 of the 88 infants in the NG group. (25% vs. 17%, p<0.05). Persistent periventricular hyperechogenicity (> 2 weeks), cystic PVL and parenchymal lesions were more common in HG infants (33% vs. 11%, p<0.05)                                                                                                                                                                                                                                                                                                                                                                                                                                                                                              |                         | The neonatal mortality rate was higher in the HG group. HG in VLBW neonates was associated with abnormal brain ultrasound.                                                                                                                     |
| Lilien 1979  | 11 out of 14 infants in the HG group and 5 out of 16 in the NG group died.                                                                                                                                                                                                                                                                                                                                                                                                                                                                                                                                                                                                                                                                       |                         | There was no difference in mortality between stressed HG                                                                                                                                                                                       |



|  |                                                                                            |  |                                                                            |
|--|--------------------------------------------------------------------------------------------|--|----------------------------------------------------------------------------|
|  | 9 out of 14 infants in the HG group and 2 out of 16 in the NG group had brain haemorrhage. |  | and stressed NG infants; stress, rather than HG, was related to mortality. |
|--|--------------------------------------------------------------------------------------------|--|----------------------------------------------------------------------------|

GA: Gestational age, BW: Birth weight, PMA: Post menstrual age, CA: Corrected age, VLBW: Very low birth weight infant, ELBW: Extremely low birth weight infant, SBP: Systolic blood pressure, DBP: Diastolic blood pressure, NA: Not available, RDS: Respiratory distress syndrome, IVH: Intra ventricular haemorrhage, NEC: Necrotising enterocolitis, CLD: Chronic lung disease, LOS: Late onset sepsis, ROP: Retinopathy of prematurity, PVL: Periventricular leucomalacia, GV: Glycaemic variability, CV: Coefficient of variation, MAGE: Mean amplitude glucose excursion, OR: Odds ratio, CI: Confidence interval, SD: Standard deviation, IQR: Inter quartile range, SEM: Standard error of mean, LF: Lactoferrin, TPN: Total parenteral nutrition, WM: White matter, BSID: Bayley scale of infant development, DA: Developmental assessment, SGA: Small for gestational age, FiO<sub>2</sub>: Fraction of inspired oxygen, CRIB: Clinical risk index for babies, NG: Normoglycaemia, HG: Hyperglycaemia, RC: Retrospective cohort study, PC: Prospective cohort study, CC: Case control study.

**e Table 2: Sensitivity analysis after including multiple results from the same study**

| Outcome                     |            | Number of studies in the meta-analysis | OR (95% CI)       | P value  | I <sup>2</sup> in % |
|-----------------------------|------------|----------------------------------------|-------------------|----------|---------------------|
| <b>Cohort studies</b>       |            |                                        |                   |          |                     |
| Mortality                   | Unadjusted | 23                                     | 3.37 (2.27-5.00)  | <0.00001 | 69                  |
|                             | Adjusted   | 12                                     | 2.41 (1.39-4.17)  | 0.002    | 57                  |
| IVH (Undefined)             | Unadjusted | 13                                     | 2.81 (1.85-4.28)  | <0.00001 | 47                  |
|                             | Adjusted   | 3                                      | 2.20 (1.12-4.32)  | 0.02     | 0                   |
| IVH (Severe)                | Unadjusted | 11                                     | 1.98 (1.36-2.89)  | 0.0004   | 28                  |
|                             | Adjusted   | 2                                      | 1.07 (0.36-3.17)  | 0.90     | 0                   |
| ROP (Any)                   | Unadjusted | 8                                      | 1.66 (1.06-2.61)  | 0.03     | 41                  |
|                             | Adjusted   | 2                                      | 3.7 (1.55-8.84)   | 0.003    | 0                   |
| ROP (Severe)                | Unadjusted | 12                                     | 3.32 (1.84-5.99)  | <0.0001  | 65                  |
|                             | Adjusted   | 4                                      | 1.74 (0.67-4.54)  | 0.26     | 86                  |
| LOS                         | Unadjusted | 14                                     | 1.63 (1.03-2.57)  | 0.04     | 70                  |
|                             | Adjusted   | 6                                      | 1.09 (0.59-1.99)  | 0.79     | 58                  |
| NEC (Undefined)             | Unadjusted | 5                                      | 1.25 (0.73-2.15)  | 0.42     | 0                   |
|                             | Adjusted   | No study available                     |                   |          |                     |
| NEC (Severe)                | Unadjusted | 8                                      | 1.43 (0.63-3.22)  | 0.39     | 46                  |
|                             | Adjusted   | 4                                      | 1.34 (0.34-5.21)  | 0.67     | 54                  |
| CLD                         | Unadjusted | 10                                     | 2.46 (1.92-3.15)  | <0.00001 | 0                   |
|                             | Adjusted   | 4                                      | 1.37 (0.85-2.21)  | 0.19     | 0                   |
| PVL                         | Unadjusted | 6                                      | 0.77 (0.37-1.60)  | 0.48     | 0                   |
|                             | Adjusted   | 2                                      | 0.56 (0.27-1.18)  | 0.13     | 0                   |
| Disability                  | Unadjusted | 4                                      | 1.99 (1.24-3.19)  | 0.004    | 16                  |
|                             | Adjusted   | 1                                      | 1.27 (0.56-2.86)  | 0.57     | NA (1 study only)   |
| <b>Case control studies</b> |            |                                        |                   |          |                     |
| Mortality                   | Unadjusted | 1                                      | 3.24 (0.72-14.44) | 0.12     | NA (1 study only)   |
|                             | Adjusted   | No study available                     |                   |          |                     |
| IVH (Undefined)             | Unadjusted | 3                                      | 2.06 (1.34-3.18)  | 0.001    | 0                   |
|                             | Adjusted   | No study available                     |                   |          |                     |
| IVH (Severe)                | Unadjusted | 2                                      | 2.58 (1.48-4.48)  | 0.0008   | 0                   |
|                             | Adjusted   | 1                                      | 10.33 (10-10.67)  | <0.00001 | NA (1 study only)   |
| ROP (Any)                   | Unadjusted | 3                                      | 6.49 (1.97-21.39) | 0.002    | 82                  |
|                             | Adjusted   | 3                                      | 1.26 (0.79-2.00)  | 0.33     | 52                  |
| ROP (Severe)                | Unadjusted | 3                                      | 2.15 (1.98-2.34)  | <0.00001 | 0                   |
|                             | Adjusted   | 4                                      | 1.01 (0.96-1.07)  | 0.67     | 42                  |
| LOS                         | Unadjusted | No study available                     |                   |          |                     |
|                             | Adjusted   | No study available                     |                   |          |                     |
| NEC (Undefined)             | Unadjusted | No study available                     |                   |          |                     |
|                             | Adjusted   | No study available                     |                   |          |                     |

|              |            |                    |                   |      |                   |
|--------------|------------|--------------------|-------------------|------|-------------------|
| NEC (Severe) | Unadjusted | No study available |                   |      |                   |
|              | Adjusted   | No study available |                   |      |                   |
| CLD          | Unadjusted | 1                  | 3.07 (0.87-10.81) | 0.08 | NA (1 study only) |
|              | Adjusted   | No study available |                   |      |                   |
| PVL          | Unadjusted | No study available |                   |      |                   |
|              | Adjusted   | No study available |                   |      |                   |
| Disability   | Unadjusted | No study available |                   |      |                   |
|              | Adjusted   | No study available |                   |      |                   |

CLD: Chronic Lung Disease, LOS: Late onset sepsis, IVH: Intraventricular haemorrhage, ROP: Retinopathy of prematurity, NEC: Necrotising enterocolitis, PVL: Periventricular leukomalacia, NA: Not applicable, OR: Odds ratio, CI: Confidence interval, I<sup>2</sup>: Heterogeneity

Table 3: Grade of evidence for association of neonatal hyperglycaemia with adverse outcome

| Certainty assessment                                           |                       |              |                      |              |                           |                                                                                                                                                 | Effect               | Certainty        |
|----------------------------------------------------------------|-----------------------|--------------|----------------------|--------------|---------------------------|-------------------------------------------------------------------------------------------------------------------------------------------------|----------------------|------------------|
| No of studies                                                  | Study design          | Risk of bias | Inconsistency        | Indirectness | Imprecision               | Other considerations                                                                                                                            | Pooled OR (95% CI)   |                  |
| Unadjusted Odds Ratios for Mortality from Cohort Studies       |                       |              |                      |              |                           |                                                                                                                                                 |                      |                  |
| 15                                                             | observational studies | not serious  | serious <sup>a</sup> | not serious  | not serious               | all plausible residual confounding would suggest spurious effect, while no effect was observed                                                  | 3.25 (2.10 to 5.03)  | ⊕⊕○○<br>LOW      |
| Unadjusted Odds Ratios for Mortality from Case Control studies |                       |              |                      |              |                           |                                                                                                                                                 |                      |                  |
| 1                                                              | observational studies | not serious  | serious <sup>b</sup> | not serious  | very serious <sup>c</sup> | publication bias strongly suspected all plausible residual confounding would suggest spurious effect, while no effect was observed <sup>d</sup> | 3.24 (0.72 to 14.44) | ⊕○○○<br>VERY LOW |
| Adjusted Odds Ratios for Mortality from Cohort studies         |                       |              |                      |              |                           |                                                                                                                                                 |                      |                  |
| 6                                                              | observational studies | not serious  | serious <sup>c</sup> | not serious  | not serious               | publication bias strongly suspected all plausible residual confounding would reduce the demonstrated effect <sup>d</sup>                        | 2.37 (1.40 to 4.01)  | ⊕○○○<br>VERY LOW |

| Adjusted Odds Ratios for Mortality from Case Control studies      |                       |             |                      |             |                      |                                                                                                                                                 |                               |                      |
|-------------------------------------------------------------------|-----------------------|-------------|----------------------|-------------|----------------------|-------------------------------------------------------------------------------------------------------------------------------------------------|-------------------------------|----------------------|
| 0                                                                 | observational studies |             |                      |             |                      |                                                                                                                                                 |                               |                      |
| Unadjusted Odds Ratios for "Any IVH" from Cohort studies          |                       |             |                      |             |                      |                                                                                                                                                 |                               |                      |
| 10                                                                | observational studies | not serious | not serious          | not serious | not serious          | publication bias strongly suspected all plausible residual confounding would suggest spurious effect, while no effect was observed <sup>d</sup> | <b>2.30</b><br>(1.55 to 3.40) | ⊕⊕○<br>○<br>LOW      |
| Unadjusted Odds Ratios for "Any IVH" from Case Control studies    |                       |             |                      |             |                      |                                                                                                                                                 |                               |                      |
| 1                                                                 | observational studies | not serious | serious <sup>b</sup> | not serious | not serious          | publication bias strongly suspected all plausible residual confounding would suggest spurious effect, while no effect was observed <sup>d</sup> | <b>2.30</b><br>(1.30 to 4.07) | ⊕○○<br>○<br>VERY LOW |
| Adjusted Odds Ratios for "Any IVH" from Cohort studies            |                       |             |                      |             |                      |                                                                                                                                                 |                               |                      |
| 2                                                                 | observational studies | not serious | not serious          | not serious | serious <sup>c</sup> | publication bias strongly suspected all plausible residual confounding would reduce the demonstrated effect <sup>d</sup>                        | <b>2.60</b><br>(1.09 to 6.20) | ⊕○○<br>○<br>VERY LOW |
| Adjusted Odds Ratios for "Any IVH" from Case Control studies      |                       |             |                      |             |                      |                                                                                                                                                 |                               |                      |
| 0                                                                 | observational studies |             |                      |             |                      |                                                                                                                                                 |                               |                      |
| Unadjusted Odds Ratios for "Severe IVH" from Cohort studies       |                       |             |                      |             |                      |                                                                                                                                                 |                               |                      |
| 9                                                                 | observational studies | not serious | not serious          | not serious | not serious          | publication bias strongly suspected all plausible residual confounding would suggest spurious effect, while no effect was observed <sup>d</sup> | <b>1.85</b><br>(1.37 to 2.51) | ⊕⊕○<br>○<br>LOW      |
| Unadjusted Odds Ratios for "Severe IVH" from Case Control studies |                       |             |                      |             |                      |                                                                                                                                                 |                               |                      |
| 2                                                                 | observational studies | not serious | not serious          | not serious | not serious          | publication bias strongly suspected                                                                                                             | <b>2.58</b><br>(1.48 to       | ⊕⊕○<br>○             |

|                                                                             |                       |             |                           |             |                      |                                                                                                                                                 |                                 |                      |
|-----------------------------------------------------------------------------|-----------------------|-------------|---------------------------|-------------|----------------------|-------------------------------------------------------------------------------------------------------------------------------------------------|---------------------------------|----------------------|
|                                                                             |                       |             |                           |             |                      | all plausible residual confounding would suggest spurious effect, while no effect was observed <sup>d</sup>                                     | 4.48)                           | LOW                  |
| <b>Adjusted Odds Ratios for "Severe IVH" from Cohort studies</b>            |                       |             |                           |             |                      |                                                                                                                                                 |                                 |                      |
| 1                                                                           | observational studies | not serious | serious <sup>b</sup>      | not serious | serious <sup>c</sup> | publication bias strongly suspected all plausible residual confounding would reduce the demonstrated effect <sup>d</sup>                        | <b>0.8</b><br>(0.2 to 3.2)      | ⊕○○<br>○<br>VERY LOW |
| <b>Adjusted Odds Ratios for "Severe IVH" from Case Control studies</b>      |                       |             |                           |             |                      |                                                                                                                                                 |                                 |                      |
| 1                                                                           | observational studies | not serious | serious <sup>b</sup>      | not serious | not serious          | publication bias strongly suspected all plausible residual confounding would reduce the demonstrated effect <sup>d</sup>                        | <b>10.33</b><br>(1.00 to 10.67) | ⊕○○<br>○<br>VERY LOW |
| <b>Unadjusted Odds Ratios for "Any stage ROP" from Cohort studies</b>       |                       |             |                           |             |                      |                                                                                                                                                 |                                 |                      |
| 7                                                                           | observational studies | not serious | not serious               | not serious | not serious          | publication bias strongly suspected all plausible residual confounding would suggest spurious effect, while no effect was observed <sup>d</sup> | <b>1.78</b><br>(1.12 to 2.83)   | ⊕⊕○<br>○<br>LOW      |
| <b>Unadjusted Odds Ratios for "Any stage ROP" from Case Control studies</b> |                       |             |                           |             |                      |                                                                                                                                                 |                                 |                      |
| 3                                                                           | observational studies | not serious | very serious <sup>a</sup> | not serious | serious <sup>c</sup> | publication bias strongly suspected all plausible residual confounding would suggest spurious effect, while no effect was observed <sup>d</sup> | <b>6.49</b><br>(1.97 to 21.39)  | ⊕○○<br>○<br>VERY LOW |
| <b>Adjusted Odds Ratios for "Any stage ROP" from Cohort studies</b>         |                       |             |                           |             |                      |                                                                                                                                                 |                                 |                      |
| 2                                                                           | observational studies | not serious | not serious               | not serious | serious <sup>c</sup> | publication bias strongly                                                                                                                       | <b>3.70</b><br>(1.55            | ⊕○○                  |

|                                                                           |                       |             |                           |             |                      |                                                                                                                                                 |                               |                      |
|---------------------------------------------------------------------------|-----------------------|-------------|---------------------------|-------------|----------------------|-------------------------------------------------------------------------------------------------------------------------------------------------|-------------------------------|----------------------|
|                                                                           |                       | s           |                           |             |                      | suspected all plausible residual confounding would reduce the demonstrated effect <sup>d</sup>                                                  | to 8.84)                      | ○<br>VERY LOW        |
| <b>Adjusted Odds Ratios for "Any stage ROP" from Case Control studies</b> |                       |             |                           |             |                      |                                                                                                                                                 |                               |                      |
| 3                                                                         | observational studies | not serious | serious <sup>c</sup>      | not serious | not serious          | publication bias strongly suspected all plausible residual confounding would reduce the demonstrated effect <sup>d</sup>                        | <b>1.26</b><br>(0.79 to 2.00) | ⊕○○<br>○<br>VERY LOW |
| <b>Unadjusted Odds Ratios for "Severe ROP" from Cohort studies</b>        |                       |             |                           |             |                      |                                                                                                                                                 |                               |                      |
| 9                                                                         | observational studies | not serious | serious <sup>c</sup>      | not serious | not serious          | publication bias strongly suspected all plausible residual confounding would suggest spurious effect, while no effect was observed <sup>d</sup> | <b>3.42</b><br>(1.82 to 6.40) | ⊕○○<br>○<br>VERY LOW |
| <b>Unadjusted Odds Ratios for "Severe ROP" from Case Control studies</b>  |                       |             |                           |             |                      |                                                                                                                                                 |                               |                      |
| 3                                                                         | observational studies | not serious | not serious               | not serious | not serious          | publication bias strongly suspected all plausible residual confounding would suggest spurious effect, while no effect was observed <sup>d</sup> | <b>2.15</b><br>(1.98 to 2.34) | ⊕⊕○<br>○<br>LOW      |
| <b>Adjusted Odds Ratios for "Severe ROP" from Cohort studies</b>          |                       |             |                           |             |                      |                                                                                                                                                 |                               |                      |
| 3                                                                         | observational studies | not serious | very serious <sup>a</sup> | not serious | serious <sup>c</sup> | publication bias strongly suspected all plausible residual confounding would reduce the demonstrated effect <sup>d</sup>                        | <b>1.97</b><br>(0.56 to 6.93) | ⊕○○<br>○<br>VERY LOW |
| <b>Adjusted Odds Ratios for "Severe ROP" from Case Control studies</b>    |                       |             |                           |             |                      |                                                                                                                                                 |                               |                      |
| 4                                                                         | observational studies | not serious | serious <sup>c</sup>      | not serious | not serious          | publication bias strongly suspected                                                                                                             | <b>1.01</b><br>(0.96 to       | ⊕○○<br>○             |



|                                                                                 |                       |             |                           |             |             |                                                                                                                                                 |                               |                      |
|---------------------------------------------------------------------------------|-----------------------|-------------|---------------------------|-------------|-------------|-------------------------------------------------------------------------------------------------------------------------------------------------|-------------------------------|----------------------|
|                                                                                 |                       |             |                           |             |             | all plausible residual confounding would reduce the demonstrated effect <sup>d</sup>                                                            | 1.07)                         | VERY LOW             |
| <b>Unadjusted Odds Ratios for "Late onset sepsis" from Cohort studies</b>       |                       |             |                           |             |             |                                                                                                                                                 |                               |                      |
| 9                                                                               | observational studies | not serious | serious <sup>e</sup>      | not serious | not serious | publication bias strongly suspected all plausible residual confounding would suggest spurious effect, while no effect was observed <sup>d</sup> | <b>1.97</b><br>(1.18 to 3.28) | ⊕○○<br>○<br>VERY LOW |
| <b>Unadjusted Odds Ratios for "Late onset sepsis" from Case Control studies</b> |                       |             |                           |             |             |                                                                                                                                                 |                               |                      |
| 0                                                                               | observational studies |             |                           |             |             |                                                                                                                                                 |                               |                      |
| <b>Adjusted Odds Ratios for "Late onset sepsis" from Cohort studies</b>         |                       |             |                           |             |             |                                                                                                                                                 |                               |                      |
| 3                                                                               | observational studies | not serious | very serious <sup>a</sup> | not serious | not serious | publication bias strongly suspected all plausible residual confounding would reduce the demonstrated effect <sup>d</sup>                        | <b>1.38</b><br>(0.41 to 4.72) | ⊕○○<br>○<br>VERY LOW |
| <b>Adjusted Odds Ratios for "Late onset sepsis" from Case Control studies</b>   |                       |             |                           |             |             |                                                                                                                                                 |                               |                      |
| 0                                                                               | observational studies |             |                           |             |             |                                                                                                                                                 |                               |                      |
| <b>Unadjusted Odds Ratios for "Undefined NEC" from Cohort studies</b>           |                       |             |                           |             |             |                                                                                                                                                 |                               |                      |
| 4                                                                               | observational studies | not serious | not serious               | not serious | not serious | publication bias strongly suspected all plausible residual confounding would suggest spurious effect, while no effect was observed <sup>d</sup> | <b>1.29</b><br>(0.72 to 2.30) | ⊕⊕○<br>○<br>LOW      |
| <b>Unadjusted Odds Ratios for "Undefined NEC" from Case Control studies</b>     |                       |             |                           |             |             |                                                                                                                                                 |                               |                      |
| 0                                                                               | observational studies |             |                           |             |             |                                                                                                                                                 |                               |                      |
| <b>Adjusted Odds Ratios for "Undefined NEC" from Cohort studies</b>             |                       |             |                           |             |             |                                                                                                                                                 |                               |                      |
| 0                                                                               | observational studies |             |                           |             |             |                                                                                                                                                 |                               |                      |
| <b>Adjusted Odds Ratios for "Undefined NEC" from Case Control studies</b>       |                       |             |                           |             |             |                                                                                                                                                 |                               |                      |
| 0                                                                               | observational studies |             |                           |             |             |                                                                                                                                                 |                               |                      |

| Unadjusted Odds Ratios for "Severe NEC" from Cohort studies       |                       |             |                           |             |                      |                                                                                                                                                 |                                |                      |
|-------------------------------------------------------------------|-----------------------|-------------|---------------------------|-------------|----------------------|-------------------------------------------------------------------------------------------------------------------------------------------------|--------------------------------|----------------------|
| 6                                                                 | observational studies | not serious | serious <sup>c</sup>      | not serious | not serious          | publication bias strongly suspected all plausible residual confounding would suggest spurious effect, while no effect was observed <sup>d</sup> | <b>1.91</b><br>(0.74 to 4.89)  | ⊕○○<br>○<br>VERY LOW |
| Unadjusted Odds Ratios for "Severe NEC" from Case Control studies |                       |             |                           |             |                      |                                                                                                                                                 |                                |                      |
| 0                                                                 | observational studies |             |                           |             |                      |                                                                                                                                                 |                                |                      |
| Adjusted Odds Ratios for "Severe NEC" from Cohort studies         |                       |             |                           |             |                      |                                                                                                                                                 |                                |                      |
| 3                                                                 | observational studies | not serious | serious <sup>c</sup>      | not serious | serious <sup>c</sup> | publication bias strongly suspected all plausible residual confounding would reduce the demonstrated effect <sup>d</sup>                        | <b>1.78</b><br>(0.29 to 10.78) | ⊕○○<br>○<br>VERY LOW |
| Adjusted Odds Ratios for "Severe NEC" from Case Control studies   |                       |             |                           |             |                      |                                                                                                                                                 |                                |                      |
| 0                                                                 | observational studies |             |                           |             |                      |                                                                                                                                                 |                                |                      |
| Unadjusted Odds Ratios for CLD from Cohort studies                |                       |             |                           |             |                      |                                                                                                                                                 |                                |                      |
| 8                                                                 | observational studies | not serious | not serious               | not serious | not serious          | publication bias strongly suspected all plausible residual confounding would suggest spurious effect, while no effect was observed <sup>d</sup> | <b>2.55</b><br>(1.96 to 3.30)  | ⊕⊕○<br>○<br>LOW      |
| Unadjusted Odds Ratios for CLD from Case Control studies          |                       |             |                           |             |                      |                                                                                                                                                 |                                |                      |
| 1                                                                 | observational studies | not serious | very serious <sup>b</sup> | not serious | serious <sup>c</sup> | publication bias strongly suspected all plausible residual confounding would suggest spurious effect, while no effect was observed <sup>d</sup> | <b>3.07</b><br>(0.87 to 10.81) | ⊕○○<br>○<br>VERY LOW |
| Adjusted Odds Ratios for CLD from Cohort studies                  |                       |             |                           |             |                      |                                                                                                                                                 |                                |                      |
| 3                                                                 | observational studies | not serious | not serious               | not serious | not serious          | publication bias strongly suspected                                                                                                             | <b>1.42</b><br>(0.85 to        | ⊕⊕○<br>○             |

|                                                                        |                       |             |                           |             |             |                                                                                                                                                 |                               |                      |
|------------------------------------------------------------------------|-----------------------|-------------|---------------------------|-------------|-------------|-------------------------------------------------------------------------------------------------------------------------------------------------|-------------------------------|----------------------|
|                                                                        |                       |             |                           |             |             | all plausible residual confounding would reduce the demonstrated effect <sup>d</sup>                                                            | 2.37)                         | LOW                  |
| <b>Adjusted Odds Ratios for CLD from Case Control studies</b>          |                       |             |                           |             |             |                                                                                                                                                 |                               |                      |
| 0                                                                      | observational studies |             |                           |             |             |                                                                                                                                                 |                               |                      |
| <b>Unadjusted Odds Ratios for PVL from Cohort studies</b>              |                       |             |                           |             |             |                                                                                                                                                 |                               |                      |
| 4                                                                      | observational studies | not serious | not serious               | not serious | not serious | publication bias strongly suspected all plausible residual confounding would suggest spurious effect, while no effect was observed <sup>d</sup> | <b>1.01</b><br>(0.40 to 2.56) | ⊕⊕○<br>○<br>LOW      |
| <b>Unadjusted Odds Ratios for PVL from Case Control studies</b>        |                       |             |                           |             |             |                                                                                                                                                 |                               |                      |
| 0                                                                      | observational studies |             |                           |             |             |                                                                                                                                                 |                               |                      |
| <b>Adjusted Odds Ratios for PVL from Cohort studies</b>                |                       |             |                           |             |             |                                                                                                                                                 |                               |                      |
| 1                                                                      | observational studies | not serious | very serious <sup>b</sup> | not serious | not serious | publication bias strongly suspected all plausible residual confounding would reduce the demonstrated effect <sup>d</sup>                        | <b>0.50</b><br>(0.20 to 1.25) | ⊕○○<br>○<br>VERY LOW |
| <b>Adjusted Odds Ratios for PVL from Case Control studies</b>          |                       |             |                           |             |             |                                                                                                                                                 |                               |                      |
| 0                                                                      | observational studies |             |                           |             |             |                                                                                                                                                 |                               |                      |
| <b>Unadjusted Odds Ratios for Disability from Cohort studies</b>       |                       |             |                           |             |             |                                                                                                                                                 |                               |                      |
| 3                                                                      | observational studies | not serious | not serious               | not serious | not serious | publication bias strongly suspected all plausible residual confounding would suggest spurious effect, while no effect was observed <sup>d</sup> | <b>2.35</b><br>(1.47 to 3.73) | ⊕⊕○<br>○<br>LOW      |
| <b>Unadjusted Odds Ratios for Disability from Case Control studies</b> |                       |             |                           |             |             |                                                                                                                                                 |                               |                      |
| 0                                                                      | observational studies |             |                           |             |             |                                                                                                                                                 |                               |                      |
| <b>Adjusted Odds Ratios for Disability from Cohort studies</b>         |                       |             |                           |             |             |                                                                                                                                                 |                               |                      |
| 1                                                                      | observational studies | not serious | very serious <sup>b</sup> | not serious | not serious | publication bias strongly                                                                                                                       | <b>1.27</b><br>(0.56          | ⊕○○<br>○             |

|                                                               |                           |   |  |  |  |                                                                                                                     |             |             |
|---------------------------------------------------------------|---------------------------|---|--|--|--|---------------------------------------------------------------------------------------------------------------------|-------------|-------------|
|                                                               |                           | s |  |  |  | suspected<br>all plausible<br>residual<br>confounding<br>would reduce<br>the<br>demonstrated<br>effect <sup>d</sup> | to<br>2.86) | VERY<br>LOW |
| Adjusted Odds Ratios for Disability from Case Control studies |                           |   |  |  |  |                                                                                                                     |             |             |
| 0                                                             | observation<br>al studies |   |  |  |  |                                                                                                                     |             |             |

CI: Confidence interval; OR: Odds ratio; IVH: Intraventricular Hemorrhage; ROP: Retinopathy of Prematurity; NEC: Necrotising Enterocolitis; CLD: Chronic Lung Disease; PVL: Periventricular Leukomalacia

Explanations

- a. High statistical heterogeneity
- b. Only 1 study available
- c. Wide Confidence intervals
- d. Publication Bias could not be assessed since less than 10 studies
- e. Moderate statistical heterogeneity

E Figure 1:

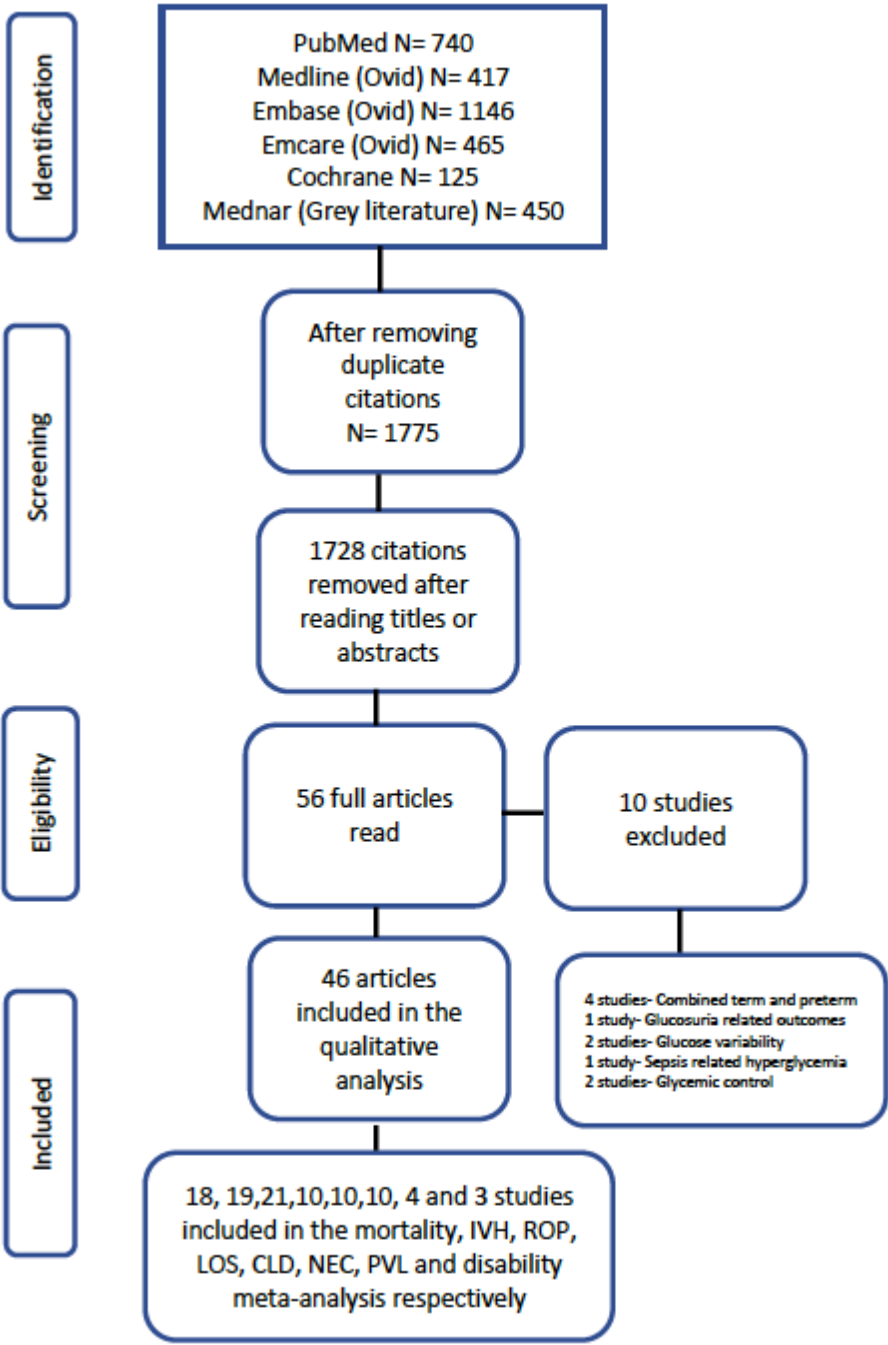

e Figure 1: Flow chart for study selection (IVH- Intraventricular hemorrhage, ROP- Retinopathy of prematurity, LOS- Late inset sepsis, CLD- Chronic lung disease, NEC- Necrotizing enterocolitis, PVL- Periventricular leukomalacia)

e Figure 2:



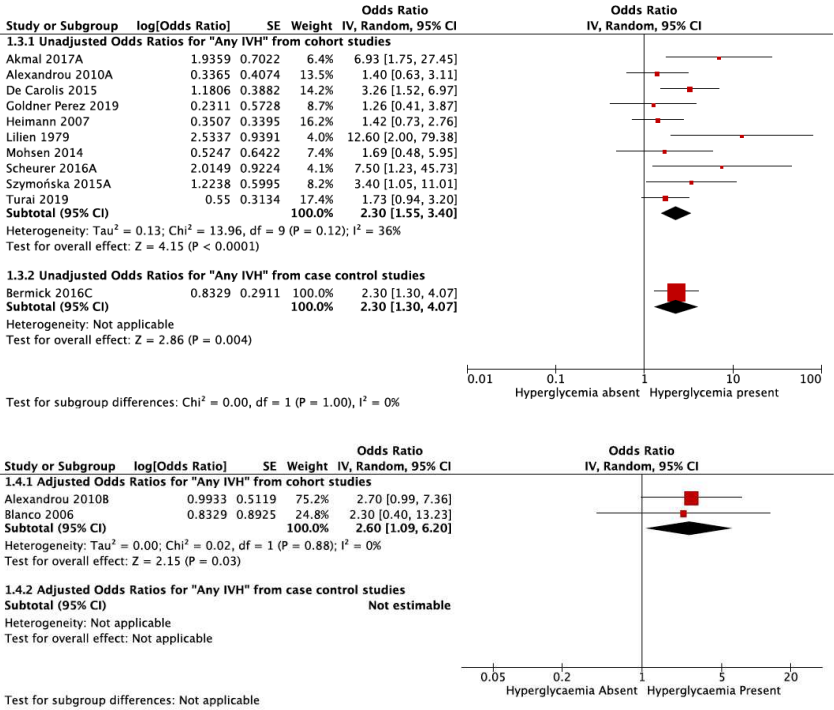

Forest plot showing the association between hyperglycemia and any grade intraventricular hemorrhage. (SE- Standard error, CI- Confidence interval, IV- Inverse variance)

e Figure 3:

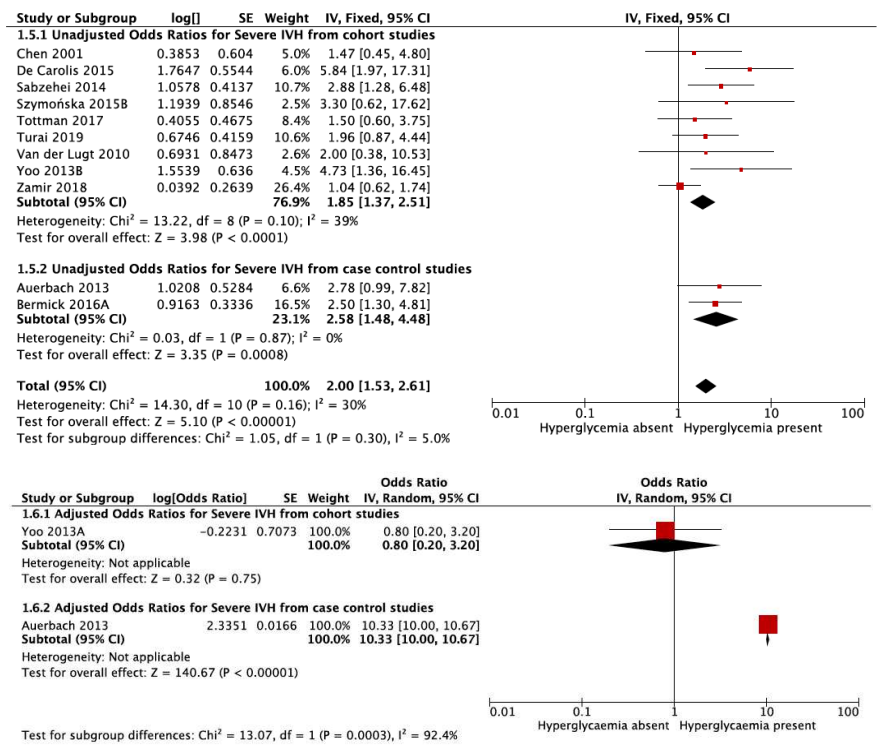

Forest plot showing the association between hyperglycaemia and severe intraventricular haemorrhage (SE- Standard error, CI- Confidence interval, IV- Inverse variance)

e Figure 4:

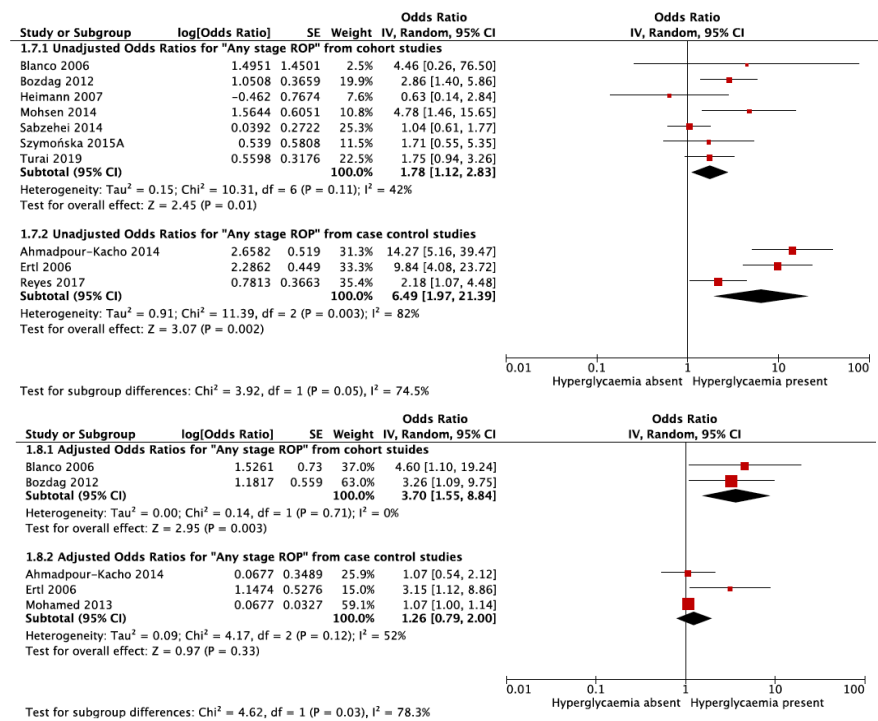

Forest plot showing the association between hyperglycemia and any stage retinopathy of prematurity. (SE- Standard error, CI- Confidence interval, IV- Inverse variance)

e Figure 5:

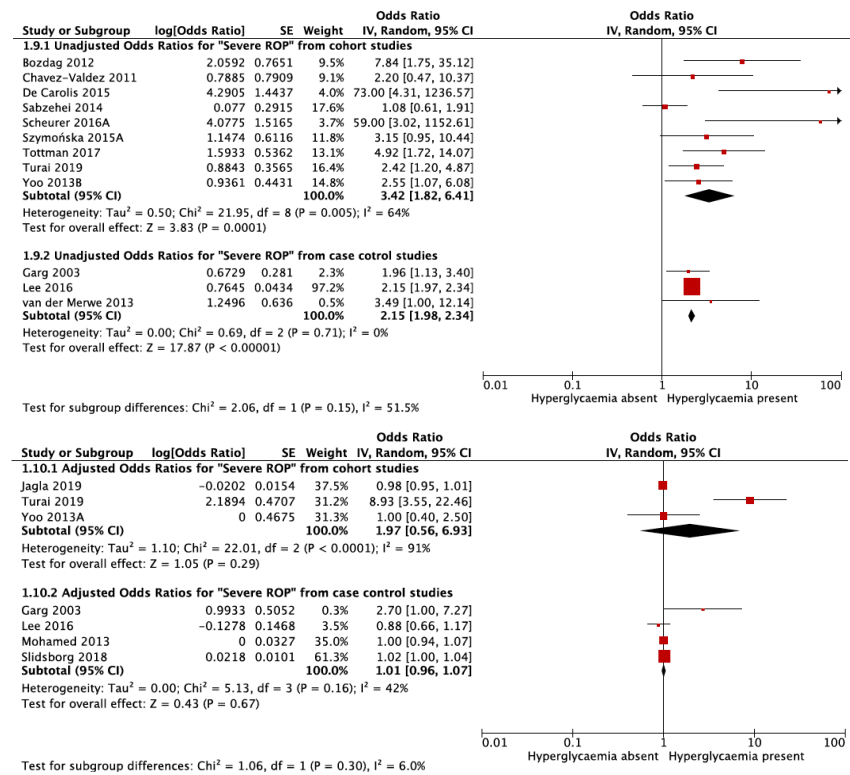

Forest plot showing the association between hyperglycemia and severe retinopathy of prematurity. (SE- Standard error, CI- Confidence interval, IV- Inverse variance)

e Figure 6:

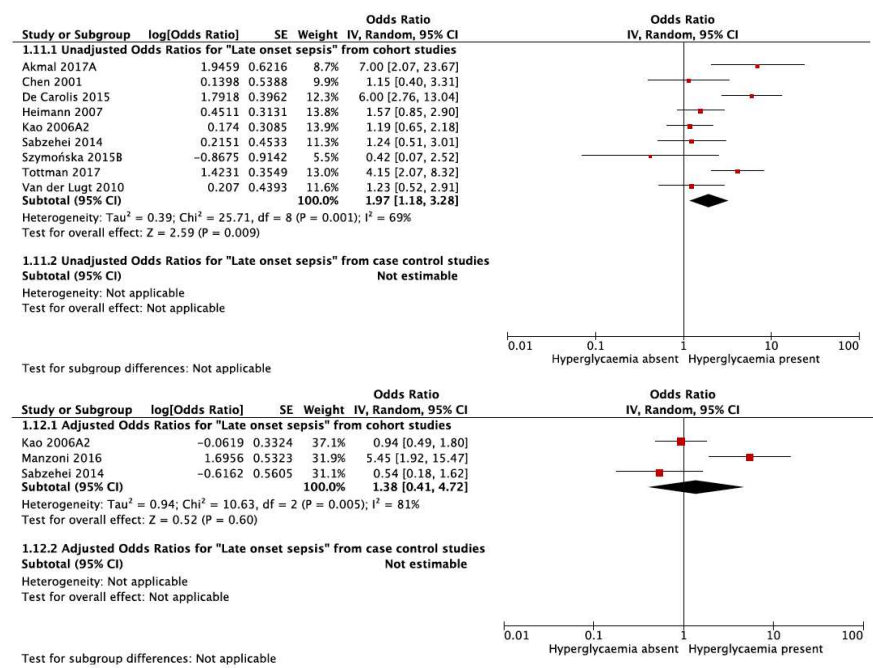

Forest plot showing the association between hyperglycemia and late onset sepsis. (SE- Standard error, CI- Confidence interval, IV- Inverse variance)

e Figure 7:

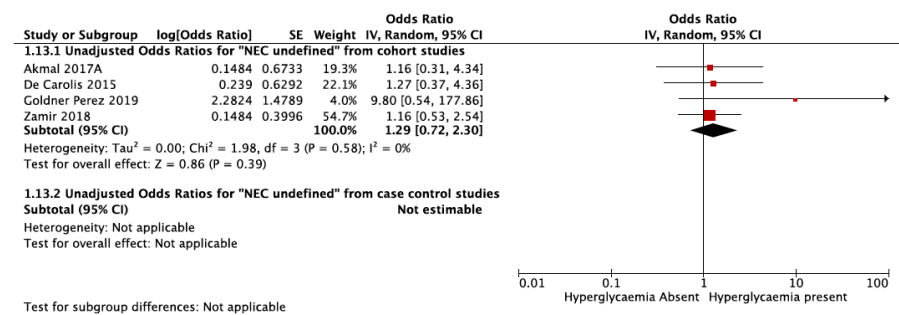

Forest plot showing the association between hyperglycemia and undefined necrotizing enterocolitis. (SE- Standard error, CI- Confidence interval, IV- Inverse variance)



e Figure 8:

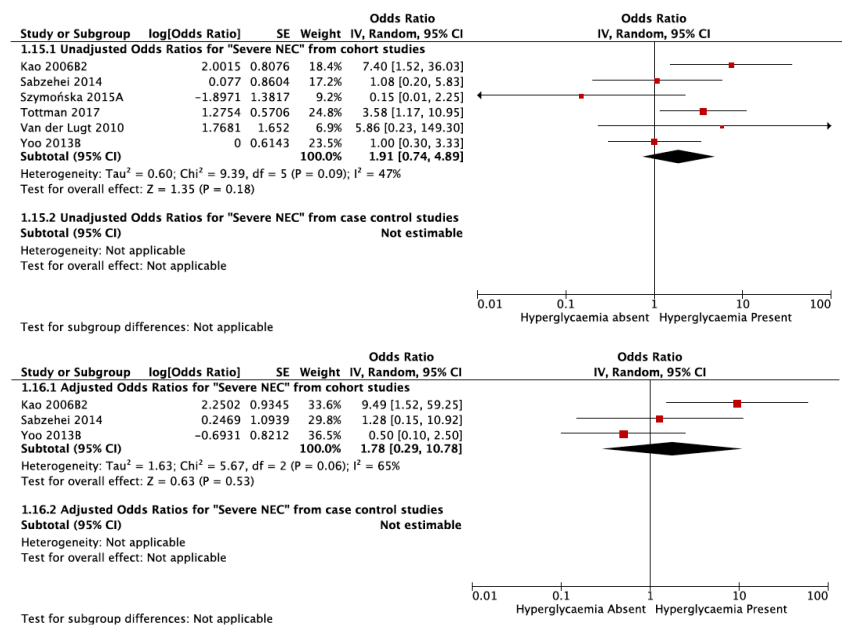

Forest plot showing the association between hyperglycemia and severe necrotizing enterocolitis. (SE- Standard error, CI- Confidence interval, IV- Inverse variance)

e figure 9:

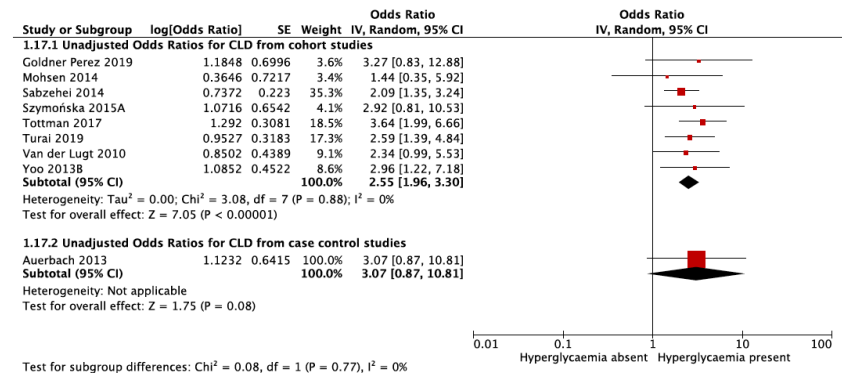

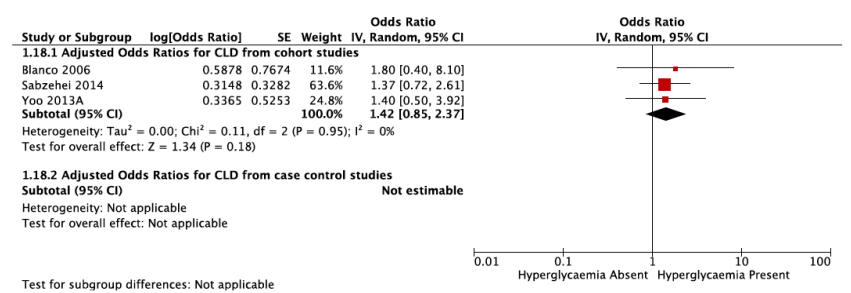

Forest plot showing the association between hyperglycemia and chronic lung disease. (SE- Standard error, CI- Confidence interval, IV- Inverse variance)

e Figure 10:

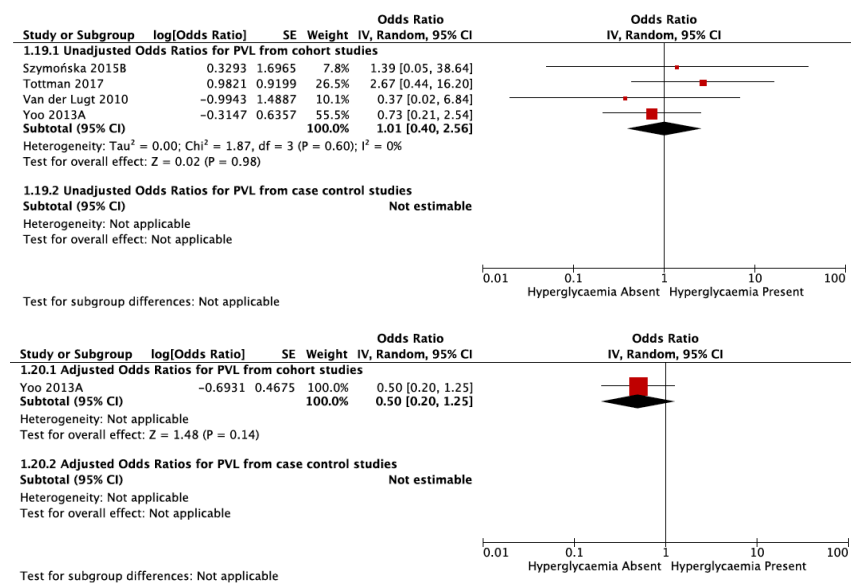

Forest plot showing the association between hyperglycemia and periventricular leucomalacia. (SE- Standard error, CI- Confidence interval, IV- Inverse variance)

Figure 11:

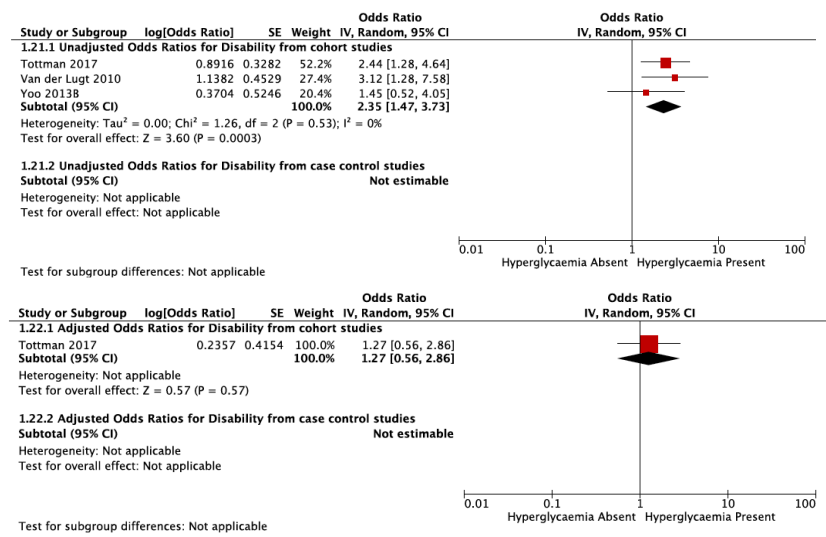

Forest plot showing the association between hyperglycemia and disability. (SE- Standard error, CI- Confidence interval, IV- Inverse variance)

Figure 12:

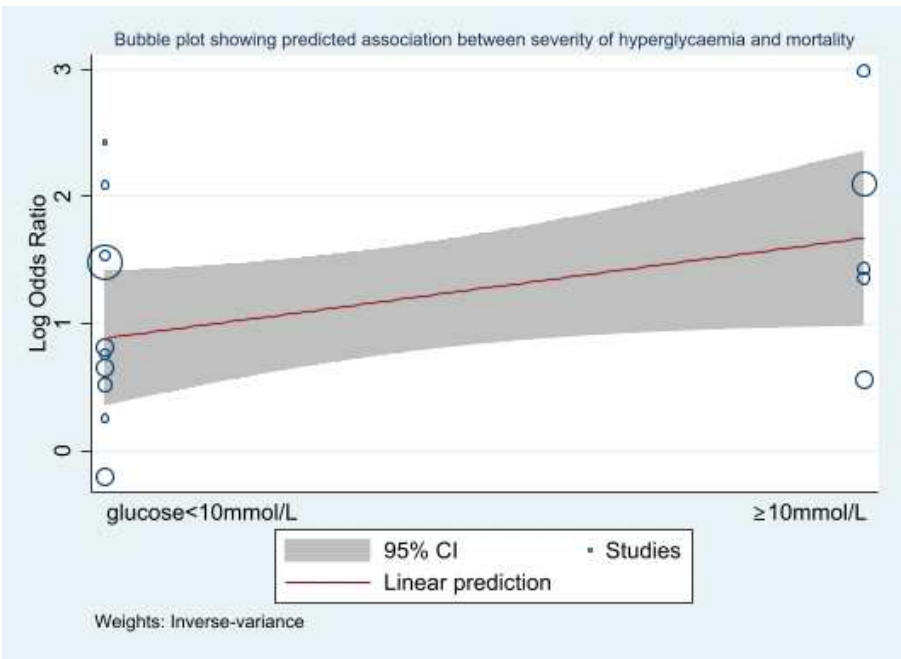

Bubble plot showing relationship between blood glucose level and unadjusted mortality

e Figure 13

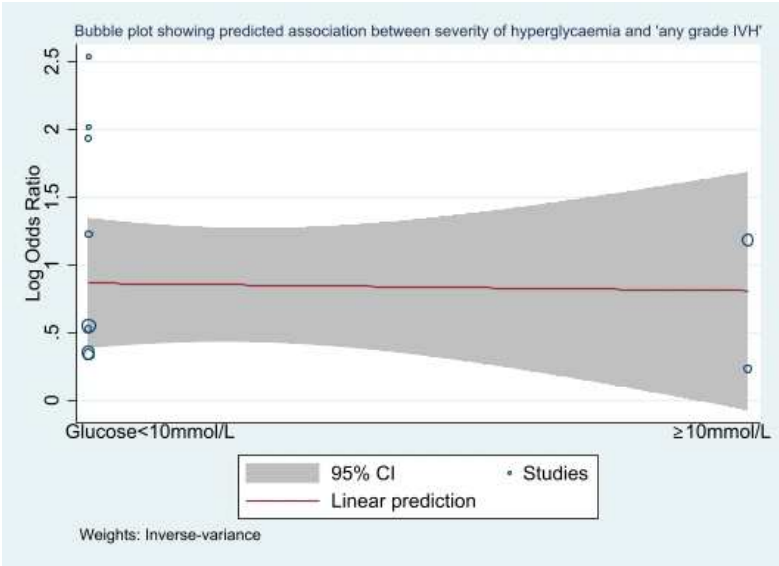

Bubble plot showing relationship between blood glucose level and unadjusted any grade intraventricular hemorrhage

e Figure 14:

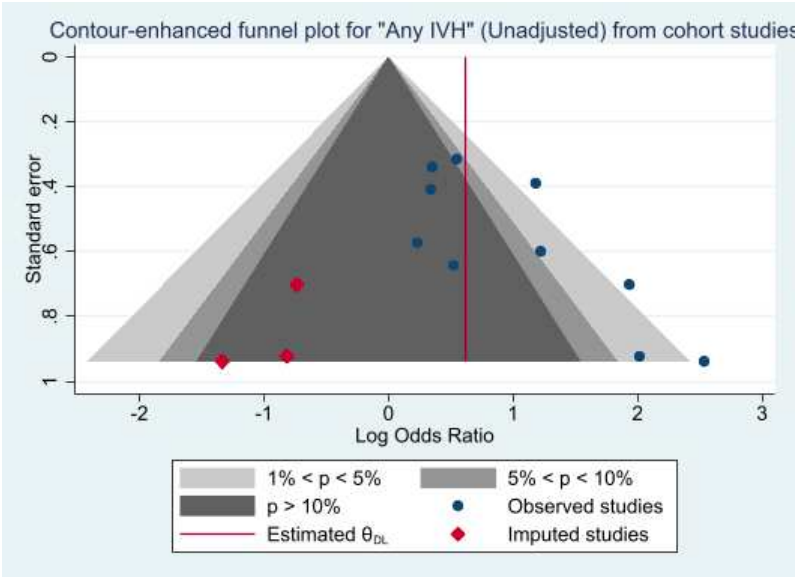

Funnel plot shows presence of publication bias probably due to 3 missing studies.
